# Supplementary material
Source: publisher site journal article supplement (https://www.dovepress.com/article/443475)
Supplement: Supplementary file 1 [file get_supplementary_file.php]

## Annex1.Semi-structuredinterviewguide

### 1. Sociodemographiccharacterofparticipant

| s/n | Character                                            | Responseof theparticipant |
|-----|------------------------------------------------------|---------------------------|
| 1   | Howold areyou?                                       | -----ageinyears           |
| 2   | Studyparticipantssex                                 | -----                     |
| 3   | What isyourmarital status?                           | -----                     |
| 4   | Whatisthehighestlevelofeducational status            | -----                     |
| 5   | WhatisyourOccupationstatus?                          | -----                     |
| 6   | WhatisyourSourceofincome?                            | -----                     |
| 7   | Howmanymonthly incomeinbirr?                         | -----                     |
| 8   | Whatarethenumberofyearsyouhadbe endiagnosedwithHF?   | -----                     |
| 9   | What is your role in the family and socialsituation? | -----                     |

### 2. Interviewguidelinefor adultpatientwithHF

1. Whendid youfirsthearaboutheart failure?Probes:
  - WhatwasyourreactiontothenewswhenyouknowthatyouhadHF?

- How did your family react when they heard that you had a cardiac condition?
  - How did you feel when you were told you had heart failure?
2. How do you express HF? Probes:
- Could you please tell me more about heart disease?
  - How does living with heart failure differ from your past experience?
  - Did you tell me about the situation you are going through with heart disease?
  - Please do express your thoughts about heart failure?
3. How would you describe your experience of living with heart failure? Probe:
- Could you tell me about how heart disease has affected your life?
  - What kind of situations have you faced?
  - How would you describe HF in terms of emotional, social, economic, physical, and health-care conditions?
  - How would you describe living with heart failure from a psychological perspective?
  - What psychological consequences does heart failure have for you?
  - Do you think there's any pressure on you to perform religious activity after having heart failure?
4. Describe how your  
illness affects your social life. Probes: social contribution, social acceptance, social support, and personal relationship. Intimacies in social situations Self-esteem, autonomy, and social functioning Satisfaction with one's life roles please describe your relationship with your parents and siblings? Probes:
- What are your social functions and relationships with the community like?
  - How do they (the community or your family) treat you?
  - How is your social interaction with your spouse/partner after having HF?
  - What does your social contribution?
  - What would be society's perception of your condition?
  - How are family and community support and care following being diagnosed with HF?
5. How would you describe your physical experience with HF? Probes:

- Doyouhavedifficultiesperformingdailyactivities?
  - Doyouhavemobilityissues relatedtodisease condition?
  - DoyouhavedifficultyofsleepduetoHFsymptom?
6. How do you describe your economic status related to HF condition? Probe: Satisfactionwith living conditions, for example, financial situation, your income, credit, job loss,treatment costforheartfailure, andtransport cost?Probes:
- How wasyoureconomicsituationafterhavingheartfailure?
  - How much money do you spend for your treatment and transportation everyfollow-up visit?
  - Could you please clarify why your income has decreased after you start yourtreatment?
7. Whatactivitiesorstrategieshelpyoutolivewithheartfailureindailylife?Probe:
- Howdo youmanagethesechangesinyourlife?
8. What things that makes difficult to live with heart failure? Probe: (work, cost, culture,and supportofyourfamily).Probes:
- Doesthepriceofyourtreatmentmakelifedifficultforyou?
  - Doeshavingfamilysupport makelivingwithHFeasierorharder?
  - Haveyouexperienceddifficultiesreceivingcare?
9. Wouldyoudescribethetreatmentyoureceivedatthehospitalforheartdisease?Probes:
- Didyoureceivehospitalized,standardizedcardiaccare?
  - Didyougateallnecessarycardiacmedicineandinvestigationinthehospital?
  - How doyougatetheservicegiventocardiacpatientsinthishospital?
10. Howdohealthprofessionalshelp you?Probe:
- How isyourdoctor'scommunicationwithyou?
  - Howwasthequalityofthemedicalattentionprovidedbydoctorsandnurses?

I have finished my questions. Let me give you a chance in case you have anything you want to add that you did not mention before closing our discussion. I greatly appreciate your willingness to help with this research. Thank you for entrusting me with you

Supplementary Table 1:Code book lists

| S.no | ListofCode                 | Description                                                                                                                                                                                               |
|------|----------------------------|-----------------------------------------------------------------------------------------------------------------------------------------------------------------------------------------------------------|
| 1    | Difficultyto livewith HF   | Changeslifenegativelyrelatedtoterriblenatureofdisease.                                                                                                                                                    |
| 2    | Difficultdisease           | Seriousnessofdiseasethat heartfailurepatientexperience.                                                                                                                                                   |
| 3    | Depression                 | Depression is a constant feeling of sadness and loss of interest due to impact of HF on social life, physical and economic wellbeing of patients, which interfere patients doing their normal activities. |
| 5    | decreasedsocialinteraction | Decreased HF patients' joint interaction in society during sadness and happiness movement.                                                                                                                |
| 6    | Feelingofanxiety           | Feeling of patients' extreme agitation, panic feeling, and terror are often accompanied by physical symptom of disease.                                                                                   |
| 7    | Comfortablewithservice     | Patients satisfied the service given both in health facility and health care professional.                                                                                                                |
| 8    | Commitment                 | HCPs Give priority of compassionate and respectful care of their patients.                                                                                                                                |
| 9    | BelievedinGod              | Patients' beloved in God as source of power, cure, recover from disease and describe new life direction wellbeing depending on God.                                                                       |
| 10   | Community support          | Support from society for HF patients through money and psychology.                                                                                                                                        |

|    |                                   |                                                                                                                                                                        |
|----|-----------------------------------|------------------------------------------------------------------------------------------------------------------------------------------------------------------------|
| 11 | Changes in life                   | Changes participant life negatively like decreased physical function, social life limitation and decreased economic.                                                   |
| 12 | Confusion                         | Mental impairment occurs in patients who are live with poor progress HF.                                                                                               |
| 13 | Cry                               | Sudden emotional response (sadness) of patients when first heard their diagnosis and they become critically ill.                                                       |
| 14 | Increased medical expenses        | Patients having high out-of-pocket medical cost directly related to the treatment of HF.                                                                               |
| 15 | Fatigue                           | HF patients feel of tiredness in time of doing labor work or at rest because of effect of heart failure.                                                               |
| 16 | Fear                              | Unpleasant feeling patients experience particular when their disease progress is poor, loss their role in the community and in family, and having physical limitation. |
| 17 | Inaccessibility of cardiac center | No access of invasive activities in hospital including cardiac surgery, treatment or rehabilitation center, and advanced diagnostic tools for heart failure patients.  |
| 18 | Hopeless                          | the patients give up their hope to live in the future with HF                                                                                                          |
| 19 | Sadness                           | Heart failure patients feeling of being emotional or unable to cope with mental or emotional pressure because of HF consequences.                                      |
| 19 | Job loss                          | Patients become unemployed because of HF physical symptom impact or consequences.                                                                                      |

|    |                         |                                                                                                                                                                                             |
|----|-------------------------|---------------------------------------------------------------------------------------------------------------------------------------------------------------------------------------------|
| 20 | Feelingoftired          | Feelingofexhaustedthattheheartfailurepatientcomplainedwh enperformingtheir routineactivity.                                                                                                 |
| 21 | Positivemind set        | Patients having a positive attitude despite diagnosis of heartfailure,andpoorprognosisofdisease,oftenhelpfulfort hemintacklingthe illness and living along with HF.                         |
| 22 | Feelingofnervous        | Peoplegenerallytendtonervouswhentheyhearaboutachronic ,potentiallyfatal illness ofheart failure.                                                                                            |
| 23 | Terrible                | The way of expression of the participant about the severity of heartfailure in term of physical function limitation, social life limitation,economicconstraints, and psychologicalpressure. |
| 24 | Incurabledisease        | The expression of the patients about the Seriousness, and lifelongnatureof thedisease.                                                                                                      |
| 25 | Diseaseburden           | Multi-faceted and life-threatening condition that HF patientsexperiencelikeeconomicpressure,andphysicall imitation                                                                          |
| 26 | Diseasecondition        | anabnormalstateofhealth,lifechangesamongHFpatientrelate dtosign andsymptom ofHF, andprolongednatureofdisease                                                                                |
| 27 | Physicalsyptom          | Symptomofpalpitation,chestpain,tachypnea,anddyspneathataf fectpatients'ability of performtheirday-to-dayactivities                                                                          |
| 28 | Healthinsurance         | Patients'medicaltreatmentcostcoverbyhealthinsuranceagent orgovernmentalofficethey employedcovertheirmedicalexpenses                                                                         |
| 29 | Increasedtransportation | Expensivecostoftransportrelatedtofrequentsfollow- upmedicalvisit.                                                                                                                           |
| 30 | Self-control            | Self-care maintenance by taking doctor prescribe drug properly,symptommonitoring,changeofhealthydiet,and reducestressforbetterquality of lifeaswell as lower mortality.                     |

|    |                               |                                                                                                                                 |
|----|-------------------------------|---------------------------------------------------------------------------------------------------------------------------------|
| 31 | Dissatisfied                  | Patients' dissatisfaction concerning the coordination of care in hospitals as well as the personal interactions with patients.  |
| 32 | Miss-communication            | Miss-understood between clinicians and patients that can be because of by their medication adherence and follow-up instruction. |
| 33 | Good hospital care            | The service given for heart failure patients in the facility is good                                                            |
| 34 | Loss of energy                | Activity intolerance or difficulty performing daily activities in patients with HF.                                             |
| 35 | Good professional care        | Heart failure patients express Care given by doctors and nurses are good and appropriate.                                       |
| 36 | Huge medical expenses         | High mean monthly direct medical cost among heart failure patients.                                                             |
| 37 | Unaffordable medical expenses | Medical expense of patients paid each follow-up visit beyond their income.                                                      |
| 38 | Professional support          | Give care and help patients on journey back to full health, living without suffering.                                           |
| 39 | Trust in HCP                  | The patients need to have faith in their doctors or nurses which help them in following the treatment properly                  |
| 40 | Physical limitation           | Heart failure patients' inability to perform normal physical activity due to HF physical symptom.                               |
| 41 | Financial threat              | Future financial challenges of HF patients related to expensive cost of treatment, and loss of job.                             |
| 42 | Loss of strength              | Patients with HF experience weakness, which makes it difficult to perform everyday tasks or exercise.                           |

|    |                                        |                                                                                                                                                                                                      |
|----|----------------------------------------|------------------------------------------------------------------------------------------------------------------------------------------------------------------------------------------------------|
| 43 | Self-blame                             | Feeling of worries or unhappiness of participants due to that they have done something bad for their health such as, they did not follow professional advice, they did not modified their lifestyle. |
| 44 | Long stay                              | Heart failure patients waiting long time without get the service. Due to personal and facility problem.                                                                                              |
| 45 | Difficulty of perform daily activities | Heart failure patients experienced physical limitation to carry out their routine tasks or activities.                                                                                               |
| 46 | Loss of confidence                     | Low self-esteem of heart failure patients due to disease condition of functional limitation and loss of family role                                                                                  |
| 47 | Social life change                     | Patients' social life change negatively because of physical limitation, hobby restriction, and economic constraints after diagnosis of HF                                                            |
| 48 | Extra cost for food                    | patients' indirect out-of-pocket expenses for food during their follow-up medical appointment                                                                                                        |
| 49 | Good hospital care                     | Patients are satisfied with their care at the facility                                                                                                                                               |
| 50 | Good health professional care          | Appreciation for nurses and doctors' hard work and nice care given to heart failure patients in cardiac clinic.                                                                                      |
| 51 | HCPs delay                             | Doctors and nurses do not adhere to working hours; they did not give treatment, and care timely for heart failure.                                                                                   |
| 52 | Accept disease condition               | The patient has accepted the condition they live                                                                                                                                                     |



|    |                          |                                                                                                                                                                    |
|----|--------------------------|--------------------------------------------------------------------------------------------------------------------------------------------------------------------|
| 53 | Change of diet           | Patients switch to a healthy diet after knowing about the condition of HF.                                                                                         |
| 54 | Absence of senior doctor | Most of time Heart failure patients were not directly treated by senior cardiologist doctor because of clinical negligence. Doctors were not present in work area. |
| 55 | Family support           | Support from family in moral, physical, and economical was a vital factor to get through difficult periods.                                                        |
| 56 | Faith in God             | Heart failure patients describe their current recovery, wellness, and future well-being in dependence on their faith in God.                                       |
| 57 | Economic pressure        | Patients are under financial strain as a result of their direct and indirect medical expenditures as well as job loss.                                             |
| 58 | Shortage of money        | Patients have not enough money to cover their medical expenses.                                                                                                    |
| 59 | Hobby restriction        | Heart failure patients may have less energy to put into sport, join with friends, and other activities.                                                            |
